# Supplementary material
Source: Springer Nature journal article supplement (https://www.springermedizin.de/resource/supplementary/12933_2010_300_MOESM1_ESM.pdf/9540052)
Supplement: MOESM1 [file 9540052]

## Participants Enrolled

N = 201

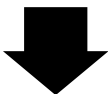

## Visit 1

N = 201

|            |        |
|------------|--------|
| 39 (19.4%) | Winter |
| 53 (26.4%) | Spring |
| 41 (20.4%) | Summer |
| 68 (33.8%) | Fall   |

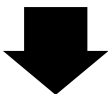

## Visit 2

N = 180 (90.1%)

|            |        |
|------------|--------|
| 51 (28.3%) | Winter |
| 40 (22.2%) | Spring |
| 49 (27.2%) | Summer |
| 40 (22.2%) | Fall   |

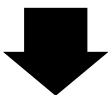

## Visit 3

N = 167 (83.1%)

|            |        |
|------------|--------|
| 35 (21.0%) | Winter |
| 51 (30.5%) | Spring |
| 38 (22.8%) | Summer |
| 43 (25.7%) | Fall   |

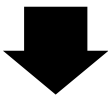

## Visit 4

N = 139 (69.2%)

|            |        |
|------------|--------|
| 39 (28.1%) | Winter |
| 26 (18.7%) | Spring |
| 45 (32.4%) | Summer |
| 29 (20.9%) | Fall   |
